# Supplementary material
Source: MDPI journal article supplement (https://www.mdpi.com/2073-4441/14/18/2881)
Supplement: s1 [file s1]

# Preparation of Cu-Ce@ $\gamma$ -Al<sub>2</sub>O<sub>3</sub> and Study on Catalytic Ozone Oxidation for the Treatment of RO Concentrate Water

Wenquan Sun, Zhiqiang Xiao, Yongjun Sun, Lei Ding and Jun Zhou \*

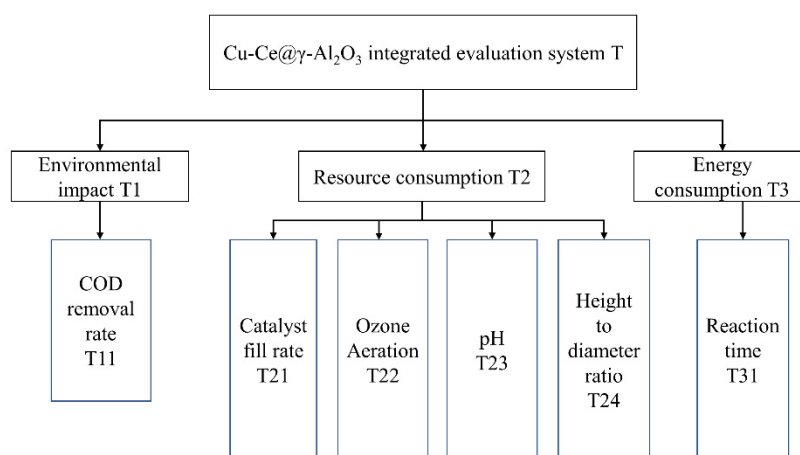

**Figure S1.** Comprehensive evaluation index system of Cu-Ce@ $\gamma$ -Al<sub>2</sub>O<sub>3</sub> catalysts for catalytic oxidative degradation of RO concentrated water.

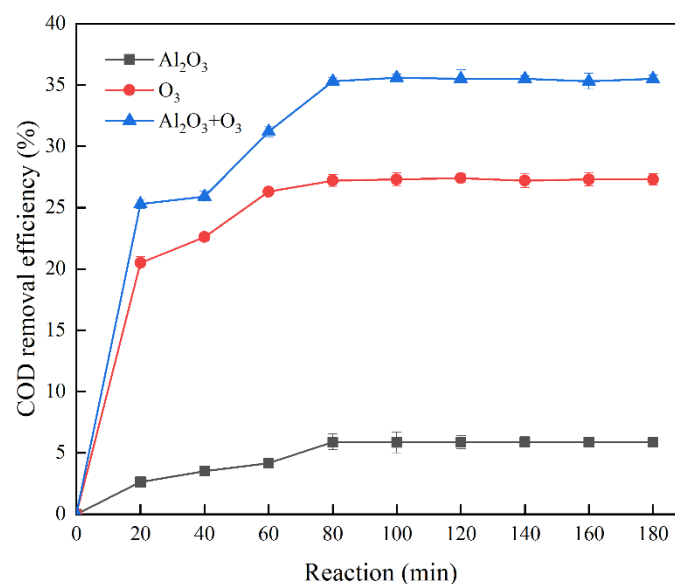

**Figure S2.** Effect of different reaction systems on COD removal efficiency.

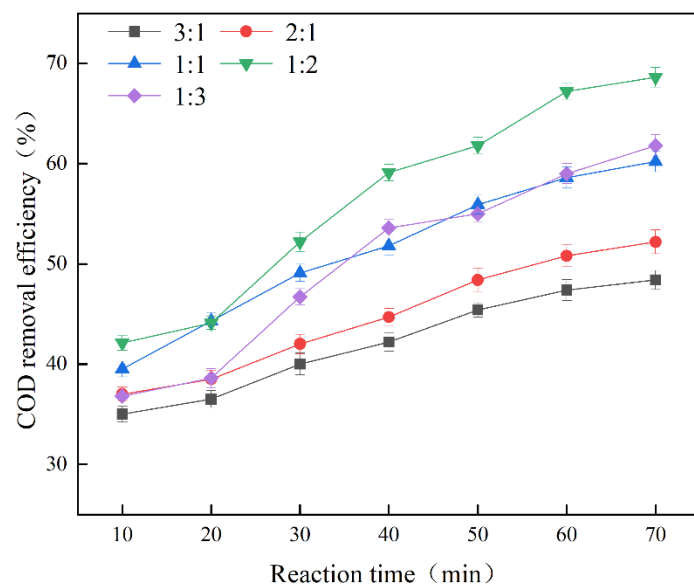

Figure S3. Effect of active component proportion of Ce:Cu on COD removal efficiency.

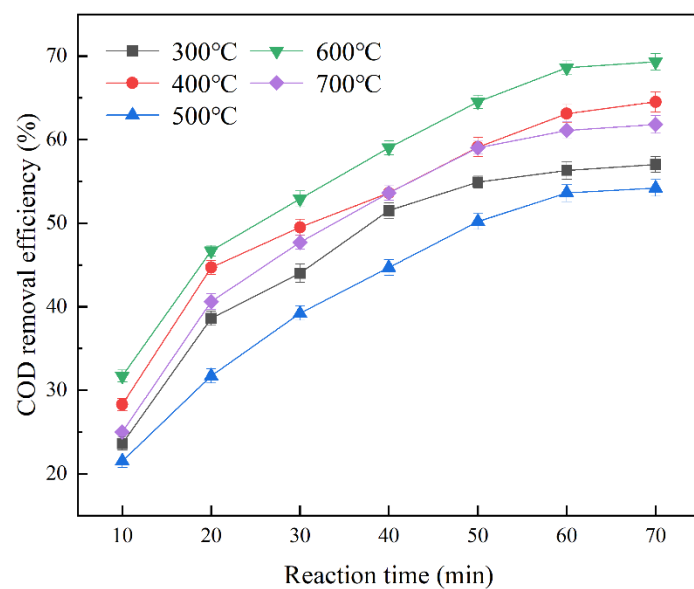

Figure S4. Effect of calcination temperature on COD removal efficiency.

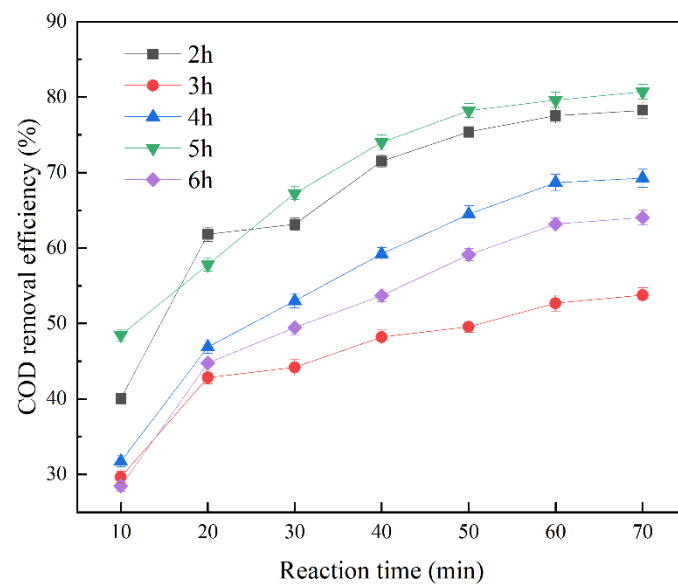

Figure S5. Effect of calcination time on COD removal efficiency.

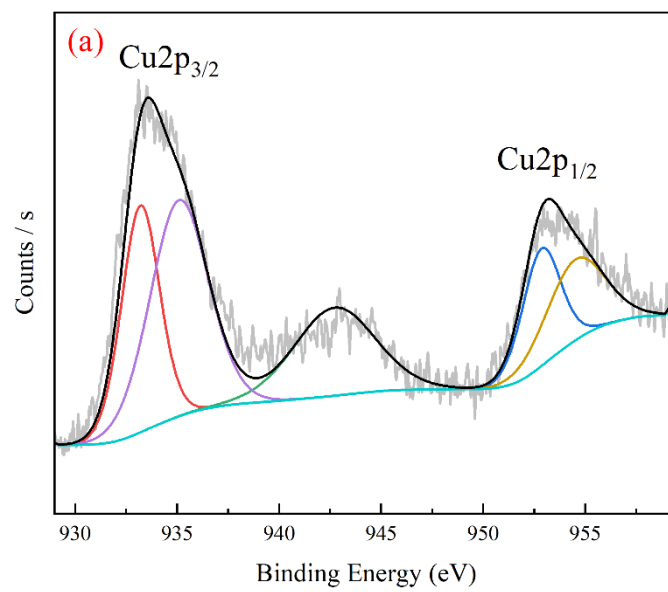

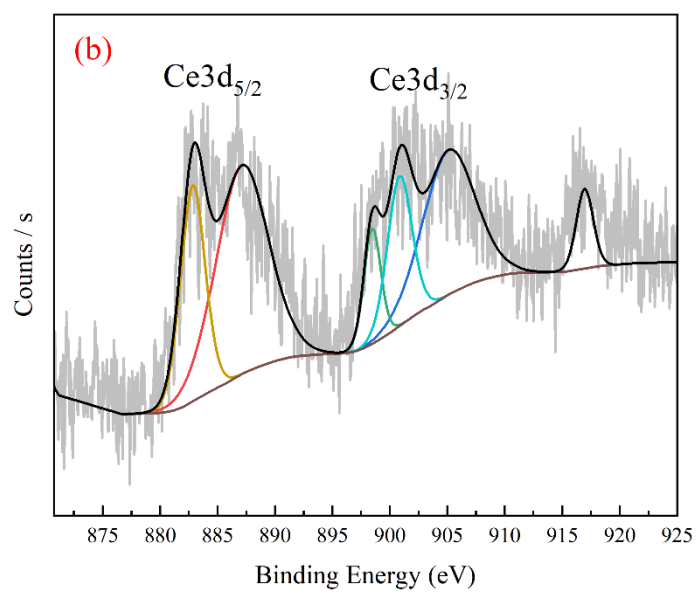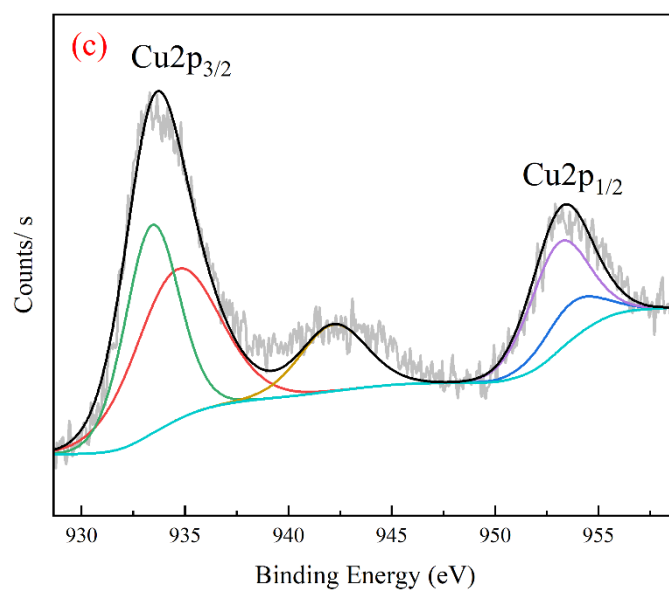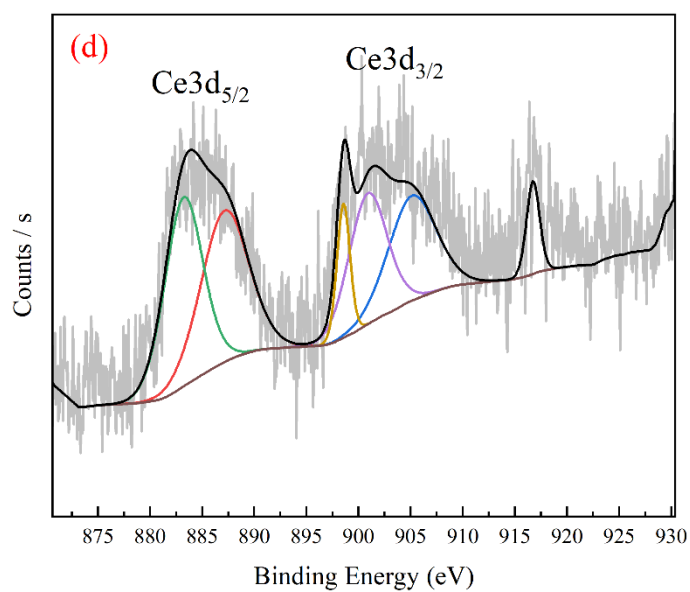

**Figure S6.** XPS characterization: (a) Cu2p spectrum, (b) Ce3d spectrum, (c) Cu2p spectrum after repeated use 30 times, (d) Ce3d spectrum after repeated use 30 times.

**Table S1.** 1–9 scaling method.

| Intensity of Importance | Comparison between $A_i$ and $A_j$ |
|-------------------------|------------------------------------|
| 1                       | Equal importance                   |
| 3                       | Moderate importance                |
| 5                       | Strong importance                  |
| 7                       | Very strong importance             |
| 9                       | Extreme importance                 |
| 2, 4, 6, 8              | Intermediate values                |

**Table S2.** The judgment matrix of criterion layer to target layer.

| T                       | T1  | T2  | T3 | Weight $M_i$ |
|-------------------------|-----|-----|----|--------------|
| Environmental impact T1 | 1   | 2   | 3  | 0.5396       |
| Resource consumption T2 | 1/2 | 1   | 2  | 0.2970       |
| Energy consumption T3   | 1/3 | 1/2 | 1  | 0.1634       |

**Table S3.** Judgment matrix for environmental impact at the scheme layer.

| Environmental impact T1    | T11 | Weight $M_i$ |
|----------------------------|-----|--------------|
| COD removal efficiency T11 | 1   | 1.0000       |

**Table S4.** Judgment matrix for resource consumption at the scheme layer.

| T2                     | T21 | T22 | T23 | T24 | Weight $M_i$ |
|------------------------|-----|-----|-----|-----|--------------|
| Catalyst fill rate T21 | 1   | 2   | 3   | 4   | 0.4668       |
| Ozone dosage T22       | 1/2 | 1   | 2   | 3   | 0.2776       |
| Initial pH T23         | 1/3 | 1/2 | 1   | 2   | 0.1603       |
| H/D T24                | 1/4 | 1/3 | 1/2 | 1   | 0.0953       |

**Table S5.** Judgment matrix for energy consumption at the scheme layer.

| T3                | T31 | Weight $M_i$ |
|-------------------|-----|--------------|
| Reaction time T31 | 1   | 1.0000       |

**Table S6.** The value standard of RI.

| n  | 1    | 2    | 3    | 4    | 5    | 6    | 7    | 8    | 9    |
|----|------|------|------|------|------|------|------|------|------|
| RI | 0.00 | 0.00 | 0.58 | 0.90 | 1.12 | 1.24 | 1.32 | 1.41 | 1.45 |

**Table S7.** Consistency test.

| Judgement matrix | The maximum eigenvalue corresponding to eigenvector | Maximum eigenvalue | CR     | Consistency check |
|------------------|-----------------------------------------------------|--------------------|--------|-------------------|
| T                | (0.5396, 0.2970, 0.1634)                            | 3.0092             | 0.0079 | Meet consistency  |

|    |                                  |        |        |                  |
|----|----------------------------------|--------|--------|------------------|
| T1 | (1)                              | 1      | 0      | Meet consistency |
| T2 | (0.4668, 0.2776, 0.1603, 0.0953) | 4.0311 | 0.0115 | Meet consistency |
| T3 | (1)                              | 1      | 0      | Meet consistency |

Table S8. The total ranking weight of each index layer.

| Goal                                                                          | Criteria                         | Sub-criteria               | Single ranking weight | Total ranking weight |
|-------------------------------------------------------------------------------|----------------------------------|----------------------------|-----------------------|----------------------|
| Cu-Ce@ $\gamma$ -Al <sub>2</sub> O <sub>3</sub><br>Comprehensive Evaluation T | Environmental impact T1 (0.5396) | COD removal efficiency T11 | 1.0000                | 0.5396               |
|                                                                               | Resource consumption T2 (0.2970) | Catalyst fill rate T21     | 0.4668                | 0.1386               |
|                                                                               |                                  | Ozone dosage T22           | 0.2776                | 0.0824               |
|                                                                               |                                  | Initial pH T23             | 0.1603                | 0.0476               |
|                                                                               |                                  | H/D T24                    | 0.0953                | 0.0284               |
|                                                                               | Energy consumption T3 (0.1634)   | Reaction time T31          | 1                     | 0.1634               |

Table S9. Qualitative index evaluation standard.

| Qualitative index | Extremely reasonable | More reasonable | Medium | Less reasonable | Totally unreasonable |
|-------------------|----------------------|-----------------|--------|-----------------|----------------------|
| Initial pH T23    | 8–10                 | 6–8             | 4–6    | 2–4             | 0–2                  |

Table S10. Summary of experimental data.

| NO | Environmental impact T1 | Resource consumption T2 |              | Energy consumption T3 |          |                   |
|----|-------------------------|-------------------------|--------------|-----------------------|----------|-------------------|
|    | COD removal efficiency  | Catalyst fill rate      | Ozone dosage | Initial pH            | H/D      | Reaction time T31 |
|    | T11<br>%                | T21<br>cm               | T22<br>g/L   | T23<br>/              | T24<br>/ | min               |
| 1  | 45.5                    | 8                       | 0.2          | 7.49                  | 6:1      | 20                |
| 2  | 66.5                    | 8                       | 0.2          | 7.49                  | 6:1      | 40                |
| 3  | 78.2                    | 8                       | 0.2          | 7.49                  | 6:1      | 60                |
| 4  | 78.8                    | 8                       | 0.2          | 7.49                  | 6:1      | 80                |
| 5  | 51.5                    | 8                       | 0.2          | 3                     | 6:1      | 60                |
| 6  | 53.8                    | 8                       | 0.2          | 5                     | 6:1      | 60                |
| 7  | 68.2                    | 8                       | 0.2          | 7                     | 6:1      | 60                |
| 8  | 79.8                    | 8                       | 0.2          | 9                     | 6:1      | 60                |
| 9  | 80.3                    | 8                       | 0.2          | 11                    | 6:1      | 60                |
| 10 | 64.8                    | 8                       | 0.1          | 9                     | 6:1      | 60                |
| 11 | 81.5                    | 8                       | 0.3          | 9                     | 6:1      | 60                |
| 12 | 82.2                    | 8                       | 0.4          | 9                     | 6:1      | 60                |
| 13 | 83.3                    | 8                       | 0.5          | 9                     | 6:1      | 60                |
| 14 | 65.2                    | 4                       | 0.2          | 9                     | 6:1      | 60                |
| 15 | 82.2                    | 12                      | 0.2          | 9                     | 6:1      | 60                |
| 16 | 82.4                    | 16                      | 0.2          | 9                     | 6:1      | 60                |
| 17 | 82.6                    | 20                      | 0.2          | 9                     | 6:1      | 60                |
| 18 | 63.2                    | 12                      | 0.2          | 9                     | 3:1      | 60                |

|    |      |    |     |   |      |    |
|----|------|----|-----|---|------|----|
| 19 | 85.2 | 12 | 0.2 | 9 | 5:1  | 60 |
| 20 | 77.3 | 12 | 0.2 | 9 | 7:1  | 60 |
| 21 | 63.3 | 12 | 0.2 | 9 | 9:1  | 60 |
| 22 | 61.2 | 12 | 0.2 | 9 | 11:1 | 60 |

**Table S11.** BET characterization analysis of Cu-Ce@ $\gamma$ -Al<sub>2</sub>O<sub>3</sub> catalyst.

| Sample                                                                        | Specific surface area<br>(m <sup>2</sup> /g) | Average pore<br>volume (cm <sup>3</sup> /g) | Average pore size<br>(nm) |
|-------------------------------------------------------------------------------|----------------------------------------------|---------------------------------------------|---------------------------|
| $\gamma$ -Al <sub>2</sub> O <sub>3</sub>                                      | 142.27                                       | 0.35                                        | 10.38                     |
| Cu-Ce@ $\gamma$ -Al <sub>2</sub> O <sub>3</sub>                               | 181.93                                       | 0.44                                        | 9.73                      |
| Cu-Ce@ $\gamma$ -Al <sub>2</sub> O <sub>3</sub> after<br>utilization 30 times | 146.84                                       | 0.37                                        | 9.61                      |

**Text S1:** After weighing 25 g of catalyst prepared under optimal conditions into a conical flask, pure water was added until the catalyst was completely submerged, then the shaking speed of the shaker was set at 60, 90, 120, 150 and 180 rpm and the temperature was set at 25°C. The conical flask with the catalyst was then placed in a water bath shaker for 12 h. The catalyst was then removed and dried in an oven, weighed and the wear rate was calculated.

$$A = \frac{M_0 - M_1}{M_0} \times 100\% \quad (\text{S1})$$

A: Catalyst wear rate;

M<sub>0</sub>: Initial mass of catalyst;

M<sub>1</sub>: Mass of catalyst after shaking.

**Text S2:** Ozone utilization

$$C_0 = \frac{C_T - C_W - C_R}{C_T} \times 100\% \quad (\text{S2})$$

C<sub>0</sub>: Ozone utilization;

C<sub>T</sub>: Total ozone dosing;

C<sub>W</sub>: Residual ozone in water;

C<sub>R</sub>: Ozone content in exhaust gas.

**Text S3:** The calculation of index weight and consistency check, the calculation of index membership, and the structure of factor evaluation set R.

### 1. Calculation of index weight and consistency test

### (1) Calculation of weight vector

After establishing the hierarchical structure, by comparing the factors at the same level, the index weight is determined by AHP method. The indexes are compared by 1-9 scale method shown in Table S1. The specific comparison method is shown in Table S1. Calculation of index weight  $W_i'$  is shown in functions 3 to 5:

$$A_i = \prod_{j=1}^n a_{ij} (i, j = 1, 2, 3 \dots, n) \quad (S3)$$

$$W_i = (A_i)^{\frac{1}{n}} \quad (S4)$$

$$W_i' = \frac{W_i}{\sum_{j=1}^n W_j} \quad (S5)$$

$A_i$ ——Product of row elements in judgement matrix;

$W_i'$ ——Single level sorting weight corresponding to an indicator.

$W_e = [W_1', W_2', W_3', \dots, W_n']^T$  is the desired weight vector.

### (2) Consistency test

In order to ensure the credibility of the fuzzy analytic hierarchy process of Cu-Ce@ $\gamma$ -Al<sub>2</sub>O<sub>3</sub> catalyst, the weights need consistency test, as shown in functions 6 to 8:

$$\lambda_{max} = \sum_{i=1}^n \frac{(AW_e)_i}{nW_i} = \frac{1}{n} \sum_{i=1}^n \frac{\sum_{j=1}^n b_{ij}W_j}{W_i} \quad (S6)$$

$$CI = \frac{\lambda_{max} - n}{n - 1} \quad (S7)$$

$$CR = \frac{CI}{RI} \times 100\% \leq 0.1 \quad (S8)$$

RI is the mean consistency index, and its value is shown in Table S6. The consistency test is passed when  $CR < 0.10$ . Use the method above to calculate the indicators selected in this article and rank them according to the importance of each indicator in this evaluation level relative to the indicators in the previous level. The index ranking results are shown in Table S2-S5. The consistency test result was shown in Table S7, Table S8 exhibited the total ranking weight of each indicator layer.

## 2. Calculation of degree of membership

According to the index system determined above, the set of evaluation factors are:

$T = \{\text{Environmental impact } t_1, \text{ Resource consumption } t_2, \text{ Energy consumption } t_3\}$

$t_1 = \{\text{COD removal efficiency } t_{11}\}$

$t_2 = \left\{ \text{Catalyst fill rate } t_{21}, \text{ Ozone gas flow } t_{22}, \text{ Initial pH } t_{23}, \frac{H}{D} t_{24} \right\}$



$t_3 = \{\text{Reaction time } t_{31}\}$

$W = [0.5396, 0.1386, 0.0824, 0.0476, 0.0284, 0.1634]$

For benefit index (the larger index value, the better evaluation) of quantitative indexes, use function 9 to determine the degree of membership:

$$\mu(a) = e^{-2.1(a_j^{\max} - a_{ij}) / (a_j^{\max} - a_j^{\min})} \quad (\text{S9})$$

Where,  $a_{ij}$  — The j-th index of the i-th plan;

$a_j^{\max}$  — The maximum value of the j-th index;

$a_j^{\min}$  — The minimum value of the j-th index

For cost index (the smaller index value, the better evaluation) of quantitative indexes, use function 10 to determine the degree of membership:

$$\mu(a) = e^{-2.1(a_{ij} - a_j^{\min}) / (a_j^{\max} - a_j^{\min})} \quad (\text{S10})$$

Where,  $a_{ij}$  — The j-th index of the i-th plan;

$a_j^{\max}$  — The maximum value of the j-th index;

$a_j^{\min}$  — The minimum value of the j-th index.

Since qualitative index cannot be directly numerically valued, the ten - point system is used to assign values to qualitative index. Table S9 shows specific assignment standards. The value obtained after the assignment is a benefit index. Therefore, function 9 is used to calculate the degree of membership. The experimental results of Cu-Ce@ $\gamma$ -Al<sub>2</sub>O<sub>3</sub> catalytic ozonation degrading RO concentrated water are summarized in Table S10.

### 3. Factor evaluation set R

According to the comprehensive evaluation index weight of Cu-Ce@ $\gamma$ -Al<sub>2</sub>O<sub>3</sub> catalyst determined by the AHP above, the weight set W is:

$$W = [0.5396, 0.1386, 0.0824, 0.0476, 0.0283, 0.0134]$$

From the degree of membership value of the six indexes in the previous section, the single - factor evaluation set of Cu-Ce@ $\gamma$ -Al<sub>2</sub>O<sub>3</sub> catalyst can be obtained:

$$R_1 = [0.1225, 0.5916, 0.5916, 0.3980, 0.4550, 1.0000]$$

$$R_2 = [0.3719, 0.5916, 0.5916, 0.3980, 0.4550, 0.4966]$$

$$R_3 = [0.6905, 0.5916, 0.5916, 0.3980, 0.4550, 0.2466]$$

$$R_4 = [0.7128, 0.5916, 0.5916, 0.3980, 0.4550, 0.1225]$$

$$R_5 = [0.1682, 0.5916, 0.5916, 0.1225, 0.4550, 0.2466]$$

$$R_6 = [0.1900, 0.5916, 0.5916, 0.2070, 0.4550, 0.2466]$$

$$R_7 = [0.4069, 0.5916, 0.5916, 0.3499, 0.4550, 0.2466]$$

$$R_8 = [0.7515, 0.5916, 0.5916, 0.5916, 0.4550, 0.2466]$$

$$R_9 = [0.7717, 0.5916, 0.5916, 1.0000, 0.4550, 0.2466]$$

$$R_{10} = [0.3399, 0.5916, 1.0000, 0.5916, 0.4550, 0.2466]$$

$$R_{11} = [0.8222, 0.5916, 0.3499, 0.5916, 0.4550, 0.2466]$$

$$R_{12} = [0.8533, 0.5916, 0.2070, 0.5916, 0.4550, 0.2466]$$

$$R_{13} = [0.9044, 0.5916, 0.1225, 0.5916, 0.4550, 0.2466]$$

$$R_{14} = [0.3472, 1.0000, 0.5916, 0.5916, 0.4550, 0.2466]$$

$$R_{15} = [0.8533, 0.3499, 0.5916, 0.5916, 0.4550, 0.2466]$$

$$R_{16} = [0.8623, 0.2070, 0.5916, 0.5916, 0.4550, 0.2466]$$

$$R_{17} = [0.8715, 0.1225, 0.5916, 0.5916, 0.4550, 0.2466]$$

$$R_{18} = [0.3123, 0.3499, 0.5916, 0.5916, 1.0000, 0.2466]$$

$$R_{19} = [1.0000, 0.3499, 0.5916, 0.5916, 0.5916, 0.2466]$$

$$R_{20} = [0.6584, 0.3499, 0.5916, 0.5916, 0.3499, 0.2466]$$

$$R_{21} = [0.3140, 0.3499, 0.5916, 0.5916, 0.2070, 0.2466]$$

$$R_{22} = [0.2810, 0.3499, 0.5916, 0.5916, 0.1225, 0.2466]$$

Then the multi-factor judgment set R of the comprehensive evaluation of Cu-Ce@ $\gamma$ -Al<sub>2</sub>O<sub>3</sub> catalyst is:

$$R = [R_1, R_2, W_3, \dots, W_{22}]^T$$

The fuzzy decision vector A was obtained as function 11:

$$A = W \times R \quad (S11)$$

Combine the weight vector W obtained above with the multi - factor judgment set R to obtain the fuzzy decision vector A:

$$A = \begin{bmatrix} 0.3921, 0.4444, 0.5755, 0.5672, 0.2805, 0.2963, 0.4202, 0.6176 \\ 0.6479, 0.4292, 0.6359, 0.6408, 0.6615, 0.4561, 0.6390, 0.6241 \\ 0.6173, 0.3626, 0.7221, 0.5309, 0.3410, 0.3208 \end{bmatrix}$$
